# Supplementary material for: Understanding Factors Leading to Primary Cesarean Section and Vaginal Birth After Cesarean Delivery in the Friuli-Venezia Giulia Region (North-Eastern Italy), 2005–2015
Source: Springer Nature journal article supplement (doi:10.1038/s41598-019-57037-y), 2020-01-15
Supplement: MOESM1 [file 41598_2019_57037_MOESM1_ESM.pdf]

**Supplementary Table 1.** Results of three models of multivariable logistic regression fitted for each delivery mode (Primary Caesarean Section, PCS; Planned PCS, PPCS; Vaginal Birth After 1 previous Caesarean Section, VBAC-1). Significant factors with odds ratio (OR); 95% confidence interval (in brackets) and Benjamini-Hochberg (BH) p-value (bottom of each cell) estimated at 5% false discovery rate (FDR). Obs.= complete (case analysis) observations.

| FACTORS                                                   | Reference category           | DELIVERY MODE                      |                                   |                               |
|-----------------------------------------------------------|------------------------------|------------------------------------|-----------------------------------|-------------------------------|
|                                                           |                              | PCS<br>(95,689 obs.)               | PPCS<br>(84,764 obs.)             | VBAC-1<br>(7,942 obs.)        |
| Presentation: breech                                      | Cephalic                     | 108.33 (95.94; 122.33)<br>0        | 195.88 (1.70.11; 225.56)<br>0     | 0.19 (0.13; 0.28)<br>1.39E-16 |
| Non reassuring foetal status: Yes                         | No                           | 13.34 (12.11; 14.70)<br>0          | 2.80 (2.27; 3.46)<br>2.09E-21     | NS                            |
| Obstructed labour (but shoulder dystocia)                 | No                           | 10.20 (9.36; 11.12)<br>0           | 2.62 (2.18; 3.14)<br>9.36E-25     | NS                            |
| Placenta previa/abruptio placenta/ante-partum haemorrhage | No                           | 41.11 (33.80; 50.01)<br>0          | 21.69 (16.97; 27.72)<br>4.80E-132 | 0.19 (0.08; 0.33)<br>1.56E-06 |
| N. previous livebirths: 1                                 | 0                            | 0.39 (0.37; 0.41)<br>2.84E-274     | 0.46 (0.43; 0.50)<br>1.31E-85     | NS                            |
| N. previous livebirths: 2                                 | 0                            | 0.29 (0.26; 0.32)<br>7.10E-122     | 0.32 (0.27; 0.37)<br>2.59E-50     | NS                            |
| Multiple birth                                            | Singleton                    | 8.88 (7.35; 10.73)<br>5.07E-112    | 9.04 (7.18; 11.39)<br>5.18E-77    | NS                            |
| Eclampsia/pre-eclampsia                                   | No                           | 5.50 (4.70; 6.44)<br>9.76E-99      | 2.87 (2.24; 3.68)<br>2.51E-16     | 0.39 (0.19; 0.82)<br>0.0228   |
| Mother's age: (40-44) years                               | 20-24                        | 3.65 (3.21; 4.15)<br>2.06E-86      | 4.34 (3.53; 5.32)<br>5.76E-44     | NS                            |
| Placenta weight: (600-999) g                              | 500-599                      | 1.59 (1.52; 1.68)<br>1.16E-72      | 1.70 (1.57; 1.83)<br>1.55E-39     | 0.55 (0.49; 0.62)<br>3.59E-20 |
| Oligohydramnios: Yes                                      | No                           | 2.58 (2.32; 2.87)<br>2.66E-66      | 2.16 (1.83; 2.56)<br>8.40E-19     | 0.24 (0.14; 0.43)<br>2.67E-06 |
| Pre-delivery LoS: (3-5) days                              | <3 days                      | 2.26 (2.05; 2.50)<br>1.15E-56      | 3.53 (3.07; 4.06)<br>5.35E-69     | 0.35 (0.23; 0.55)<br>1.03E-05 |
| Mother's age: (35-39) years                               | 20-24                        | 2.32 (2.08; 2.57)<br>8.08E-57      | 2.46 (2.07; 2.94)<br>3.15E-23     | NS                            |
| Placenta weight: (1,000-1,500) g                          | 500-599                      | 5.44 (4.38; 6.74)<br>1.37E-53      | 6.97 (5.32; 9.14)<br>3.60E-44     | 0.06 (0.02; 0.16)<br>1.13E-07 |
| Birthweight < 2,000g                                      | 2,500-4,000                  | 5.03 (4.09;6.19)<br>2.31E-52       | 2.92 (2.14; 3.99)<br>3.40E-11     | NS                            |
| Mother's age: 45+ years                                   | 20-24                        | 8.64 (6.24; 11.96)<br>4.73E-38     | 4.34 (3.53; 5.32)<br>5.85E-29     | NS                            |
| N. previous livebirths: 3                                 | 0                            | 0.25 (0.20; 0.31)<br>4.48E-36      | 0.27 (0.20; 0.37)<br>2.13E-16     | NS                            |
| Pre delivery LoS: 6+ days                                 | <3                           | 2.49 (2.13; 2.92)<br>2.98E-29      | 5.01 (4.10; 6.11)<br>5.04E-56     | 0.34 (0.18;0.64)<br>0.0016    |
| Mother's age: (30-34) years                               | 20-24                        | 1.77 (1.60; 1.95)<br>1.10E-29      | 1.91 (1.63; 2.25)<br>8.94E-15     | NS                            |
| Birthweight: (2,000-2,500) g                              | 2,500-4,000                  | 1.85 (1.66; 2.06)<br>1.91E-27      | 1.59 (1.35; 1.88)<br>6.25E-08     | 0.55 (0.39; 0.79)<br>0.0018   |
| Polyhydramnios: Yes                                       | No                           | 3.56 (2.77; 4.58)<br>1.36E-22      | 2.84 (1.94; 4.16)<br>1.50E-07     | NS                            |
| Labour analgesia: administered                            | No                           | 0.76 (0.72; 0.80)<br>3.28E-22      | 0.19 (0.16; 0.21)<br>7.20E-133    | 4.76 (3.90; 5.81)<br>3.90E-51 |
| N. previous liveborn: 4                                   | 0                            | 0.17 (0.12; 0.25)<br>8.37E-22      | 0.16 (0.10; 0.28)<br>2.26E-12     | NS                            |
| Cord prolapse: Yes                                        | No                           | 126.68 (44.04; 364.41)<br>6.61E-19 | NS                                | NS                            |
| N. US scans during pregnancy: 6+                          | <4                           | 1.37 (1.28; 1.47)<br>1.02E-18      | 1.96 (1.75; 2.21)<br>1.78E-29     | 0.68 (0.58; 0.81)<br>1.90E-15 |
| Gestation: (33-36) weeks                                  | 37-40                        | 1.53 (1.39; 1.69)<br>1.40E-16      | 1.43 (1.23; 1.66)<br>7.54E-06     | NS                            |
| Neonatal status: Stillborn                                | Liveborn                     | 0.13 (0.08; 0.21)<br>5.10E-16      | 0.03 (0.01; 0.08)<br>1.42E-12     | NS                            |
| Mother's occupation: employed (clerk)                     | Unemployed/student/housewife | 0.79 (0.74; 0.84)<br>7.52E-13      | 0.77 (0.69; 0.85)<br>3.06E-07     | NS                            |
| Mother's age: (25-29) years                               | 20-24                        | 1.36 (1.24; 1.49)<br>1.93E-10      | 1.45 (1.24; 1.69)<br>5.09E-06     | NS                            |
| Mother's education: junior secondary                      | University/more              | 1.24 (1.16; 1.32)<br>9.27E-10      | 1.19 (1.07; 1.32)<br>0.0013       | NS                            |
| Gestation: <29 weeks                                      | 37-40                        | 0.32 (0.23; 0.46)<br>1.32E-09      | 0.05 (0.02; 0.09)<br>1.81E-18     | NS                            |
| N. US scans during pregnancy: 4-5                         | <4                           | 1.21 (1.13; 1.29)<br>1.76E-08      | 1.49 (1.33; 1.66)<br>5.72E-12     | 0.78 (0.67; 0.91)<br>0.0029   |
| Mother's nationality: Non-EU                              | Italian                      | 1.22 (1.13; 1.30)<br>5.71E-08      | NS                                | NS                            |
| Mother's education: primary/none                          | University/more              | 1.56 (1.32; 1.84)<br>3.55E-07      | 1.54 (1.20; 1.97)<br>0.0012       | NS                            |
| Gestation: 41+ weeks                                      | 37-40                        | 1.15 (1.09; 1.21)<br>7.10E-07      | 0.67 (0.61; 0.74)<br>2.57E-15     | 1.33 (1.12; 1.57)<br>0.0018   |
| Birthweight: 4,000+ g                                     | 2,500-4,000                  | 1.23 (1.13; 1.33)<br>1.03E-06      | 1.18 (1.04; 1.34)<br>0.0124       | NS                            |
| Hypertension/diabetes: Yes                                | No                           | 1.37 (1.20; 1.56)<br>3.86E-06      | 1.23 (1.01; 1.49)<br>0.0452       | NS                            |
| Rh iso-immunization: Yes                                  | No                           | 3.27 (1.96; 5.45)<br>3.86E-06      | 3.63 (1.92; 6.86)<br>0.0001       | NS                            |
| Placental weight: < 500g                                  | 500-599                      | 0.88 (0.83; 0.94)<br>0.0001        | 0.84 (0.76; 0.92)<br>0.0007       | 1.36 (1.16; 1.61)<br>0.0004   |
| N. obstetric checks in pregnancy: 8+                      | 4-7                          | 1.11 (1.05; 1.18)<br>0.0002        | 1.14 (1.05; 1.25)<br>0.0045       | NS                            |

|                                                     |                              |                             |                               |    |
|-----------------------------------------------------|------------------------------|-----------------------------|-------------------------------|----|
| Mother's education: secondary                       | University/more              | 1.24 (1.16; 1.32)<br>0.0004 | NS                            | NS |
| Mother's occupation: employed (other)               | Unemployed/student/housewife | 0.89 (0.83; 0.95)<br>0.0009 | 0.86 (0.77; 0.95)<br>0.0065   | NS |
| N. previous stillbirths: 1+                         | 0                            | 1.45 (1.12; 1.88)<br>0.0070 | 1.65 (1.18; 2.31)<br>0.0051   | NS |
| Gestation: (29-32) weeks                            | 37-40                        | 1.45 (1.11; 1.91)<br>0.0088 | NS                            | NS |
| N. intentional abortions: 2+                        | 0                            | 1.25 (1.05; 1.49)<br>0.0168 | NS                            | NS |
| Mother's occupation:<br>self-employed/entrepreneurs | Unemployed/student/housewife | 0.90 (0.83; 0.98)<br>0.0216 | NS                            | NS |
| N. obstetric checks in pregnancy: <4                | 4-7                          | 1.07 (1.01; 1.13)<br>0.0286 | 1.16 (1.06; 1.27)<br>0.0013   | NS |
| Any Medical Assisted Fertilization: Yes             | No                           | 1.28 (1.03; 1.61)<br>0.0355 | 1.68 (1.25; 2.26)<br>0.0008   | NS |
| Father's age: 55+ years                             | 30-34                        | 1.32 (1.02; 1.70)<br>0.0409 | 1.98 (1.41; 2.80)<br>0.0002   | NS |
| Mother's nationality: EU (non-Italian)              | Italian                      | 0.90 (0.81; 0.99)<br>0.0438 | 0.83 (0.70; 0.97)<br>0.0261   | NS |
| Mother's occupation:<br>Blue collar                 | Unemployed/student/housewife | 0.93 (0.86; 1.00)<br>0.0477 | NS                            | NS |
| PROM: Yes                                           | No                           | NS                          | 0.43 (0.37; 0.49)<br>4.99E-36 | NS |
| Calendar year: (2005-2015)                          | Linear trend                 | NS                          | 0.97 (0.95; 0.98)<br>8.37E-09 | NS |
| Father's age: (50-54) years                         | 30-34                        | NS                          | 1.41 (1.09; 1.82)<br>0.0124   | NS |
| N. previous neonatal deaths: 1+                     | 0                            | NS                          | 2.14 (1.19; 3.84)<br>0.0144   | NS |
| Father's age: (20-24) years                         | 30-34                        | NS                          | 0.71 (0.54; 0.93)<br>0.0167   | NS |
| Father's age: (45-49) years                         | 30-34                        | NS                          | 1.21 (1.03; 1.42)<br>0.0215   | NS |
| Father's age: (40-44) years                         | 30-34                        | NS                          | 1.12 (1.00; 1.25)<br>0.0492   | NS |

**Supplementary Table 2.** Results of three models of multivariable logistic regression for each delivery mode (Primary Caesarean Section, PCS; Planned Primary Caesarean Section, PPCS; Vaginal Birth After 1 previous Caesarean Section, VBAC-1). Hospital estimates (odds ratio, OR) with 95% confidence interval (in brackets) and Benjamini-Hochberg (BH) p-value (bottom of each cell), estimated at 5% false discovery rate (FDR). NS= non-significant. Obs.= complete (case analysis) observations.

| <b>Hospital</b> | <b>PCS</b><br>(95,689 obs.)   | <b>PPCS</b><br>(84,764 obs.)  | <b>VBAC-1</b><br>(7,942 obs.) |
|-----------------|-------------------------------|-------------------------------|-------------------------------|
| <b>A</b>        | 1.42 (1.30; 1.56)<br>1.05E-13 | 2.04 (1.75; 2.39)<br>7.83E-19 | 0.60 (0.49; 0.75)<br>1.04E-05 |
| <b>B</b>        | 2.59 (2.37; 2.84)<br>1.18E-95 | 4.26 (3.66; 4.96)<br>2.64E-76 | 0.29 (0.23; 0.35)<br>7.54E-30 |
| <b>C</b>        | 1.15 (1.04; 1.29)<br>0.0113   | 1.95 (1.64; 2.32)<br>5.46E-14 | 0.63 (0.49; 0.80)<br>0.0004   |
| <b>D</b>        | 2.09 (1.83; 2.40)<br>5.33E-26 | 2.38 (1.90; 2.98)<br>1.16E-13 | 0.14 (0.09; 0.21)<br>1.76E-20 |
| <b>E</b>        | 2.33 (2.09; 2.61)<br>2.80E-50 | 4.75 (3.99; 5.64)<br>6.48E-69 | 0.16 (0.11; 0.21)<br>2.14E-30 |
| <b>F</b>        | 1.43 (1.28; 1.61)<br>1.81E-09 | 1.99 (1.65; 2.40)<br>2.18E-12 | 0.21 (0.15; 0.30)<br>4.68E-19 |
| <b>G</b>        | 0.70 (0.63; 0.79)<br>3.28E-09 | NS                            | NS                            |
| <b>H</b>        | reference                     | reference                     | reference                     |
| <b>I</b>        | 1.91 (1.70; 2.14)<br>6.78E-28 | 2.91 (2.41; 3.52)<br>8.00E-28 | 0.36 (0.27; 0.48)<br>1.82E-11 |
| <b>J</b>        | 1.61 (1.46; 1.78)<br>6.31E-22 | 2.50 (2.13; 2.94)<br>2.84E-28 | 0.41 (0.33; 0.52)<br>1.51E-14 |
| <b>K</b>        | 1.33 (1.19; 1.49)<br>5.94E-07 | 2.61 (2.19; 3.12)<br>5.31E-26 | 0.47 (0.37; 0.60)<br>3.20E-09 |

**Results of Supplementary Tables 1 and 2 belong to the same multivariable logistic regression models, adjusted for the same following factors:**

**PCS:**

- **Health care setting and timeframe:** hospital;
- **Maternal health factors:** maternal age; hypertension/diabetes; number of US scans in pregnancy; number of obstetric checks in pregnancy; pre-delivery LoS; neonatal status; any medical assisted fertilization;
- **Child's size factors:** gestational age; birthweight; placental weight;
- **Child's fragility factors:** multiple birth;
- **Obstetric history factors:** number of previous livebirths; history of intentional abortions; stillbirth history;
- **Socio-demographic factors:** paternal age; mother's nationality; mother's educational level; mother's occupation;
- **Obstetric factors:** eclampsia/pre-eclampsia; oligohydramnios; polyhydramnios; placenta previa/abruptio placenta/ ante-partum haemorrhage; non-reassuring fetal status; presentation; labour analgesia; obstructed labour (but shoulder girdle dystocia); Rh iso-immunization; cord prolapse.

**PPCS:**

- **Health care setting and timeframe:** hospital; calendar year;
- **Maternal health factors:** maternal age; hypertension/diabetes; number of US scans in pregnancy; amniocentesis; number of obstetric checks in pregnancy; pre-delivery LoS; neonatal status; any assisted medical fertilization;
- **Child's size factors:** gestational age; birthweight; placental weight;
- **Child's fragility factors:** multiple birth;
- **Obstetric history factors:** number of previous livebirths; number of previous stillbirths; number of previous neonatal deaths;
- **Socio-demographic factors:** paternal age; mother's nationality; mother's educational level; mother's occupation;
- **Obstetric factors:** eclampsia/pre-eclampsia; oligohydramnios; polyhydramnios; placenta previa/abruptio placenta/ ante-partum hemorrhage; non-reassuring fetal status; Rh iso-

immunization; presentation; labour analgesia; obstructed labour (but shoulder girdle dystocia); PROM.

**VBAC-1:**

- **Health care setting and timeframe:** hospital;
- **Maternal health factors:** maternal age; hypertension/diabetes; number of obstetric checks in pregnancy; number of US scans in pregnancy; pre-delivery LoS;
- **Child's size factors:** gestational age; birthweight; placental weight;
- **Child's fragility factors:** NA;
- **Obstetric history factors:** NA;
- **Socio-demographic factors:** NA;
- **Obstetric factors:** eclampsia/pre-eclampsia; oligo-hydramnios; non-reassuring fetal status; presentation; labour analgesia; placenta previa/abruptio placenta/ ante-partum haemorrhage.
